# Supplementary material for: ATM orchestrates the DNA-damage response to counter toxic non-homologous end-joining at broken replication forks
Source: PubMed Central journal article supplement (PMC6325118; doi:10.1038/s41467-018-07729-2), 2019-01-08
Supplement: 41467_2018_7729_MOESM2_ESM.pdf [file 41467_2018_7729_MOESM2_ESM.pdf]

## **Description of Additional Supplementary Files**

File Name: Supplementary Data 1

Description: Gene analysis of CRISPR/Cas9 screen in Atm<sup>+/+</sup> cells

File Name: Supplementary Data 2

Description: Gene analysis of CRISPR/Cas9 screen in Atm<sup>-/-</sup> cells

File Name: Supplementary Data 3

Description: Pathway analysis of CRISPR/Cas9 screen in Atm<sup>+/+</sup> cells

File Name: Supplementary Data 4

Description: Pathway analysis of CRISPR/Cas9 screen in Atm<sup>-/-</sup> cells

File Name: Supplementary Data 5

Description: Gene analysis of CRISPR/Cas9 screen in HT-29 cells

File Name: Supplementary Data 6

Description: Phospho proteome in response to CPT treatment
